# Supplementary material for: Preparation of Peptoid Antifreeze Agents and Their Structure–Property Relationship
Source: MDPI journal article supplement (doi:10.3390/polym16070990), 2024-04-04
Supplement: s1 [file s1]

**Supplementary Information**  
**Preparation of Peptoid Antifreeze Agents and Their**  
**Structure-Property Relationship Study**

Kang Yang, Di Liu, Lei Feng, Liugen Xu, Yangang Jiang, Xiran Shen, Amjad Ali,

Jianwei Lu\*, Li Guo\*

School of Materials Science & Engineering, Jiangsu University,

Zhenjiang 212013, China

**Table of contents**

|                                                                          |   |
|--------------------------------------------------------------------------|---|
| 1. Monomer synthesis and characterization .....                          | 2 |
| 2. MS spectra of peptoid oligomers.....                                  | 3 |
| 3. HPLC spectra of peptoid oligomers.....                                | 4 |
| 4. The morphologies of ice crystals.....                                 | 5 |
| 5. The growth rates of ice crystals.....                                 | 6 |
| 6. Ice recrystallization inhibition activities of peptoid oligomers..... | 7 |
| 7. Cytotoxicity test results.....                                        | 8 |

## 1. Monomer synthesis and characterization

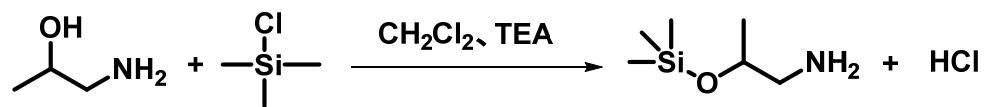

**Scheme S1** Synthesis route of submonomer 3-trimethylsilanoxy-propylamine.

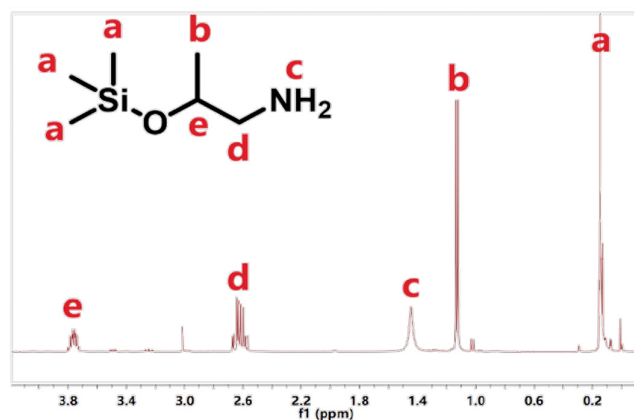

**Fig. S1** <sup>1</sup>H NMR spectrum of 3-trimethylsilanoxy-propylamine in CDCl<sub>3</sub>

## 2. MS spectra of peptoid oligomers

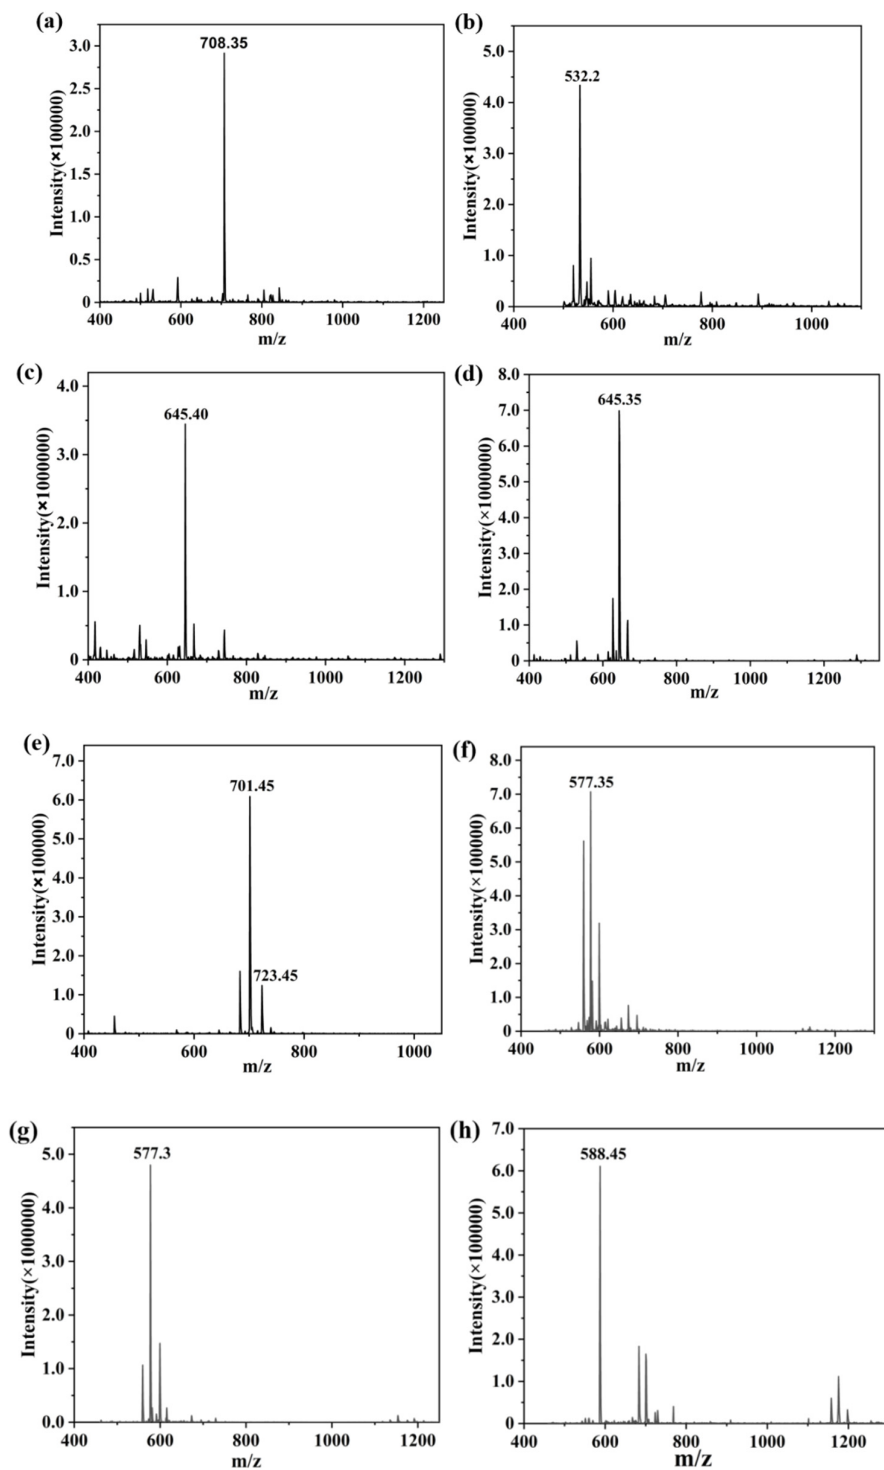

**Fig. S2** MS spectra of peptoid oligomers. (a) P-(Nis)<sub>6</sub>; (b) P-[Nis-(Nme)<sub>2</sub>]<sub>2</sub>; (c) P-[Nis-(Net)<sub>2</sub>]<sub>2</sub>; (d) P-[Nis-(Npr)<sub>2</sub>]<sub>2</sub>; (e) P-[Nis-(Nip)<sub>2</sub>]<sub>2</sub>; (f) P-[Nme-(Nis)<sub>2</sub>]<sub>2</sub>; (g) P-(Nis-Nme)<sub>3</sub>; (h) P-(Nis-Nme)<sub>3</sub>

### 3. HPLC spectra of peptoid oligomers

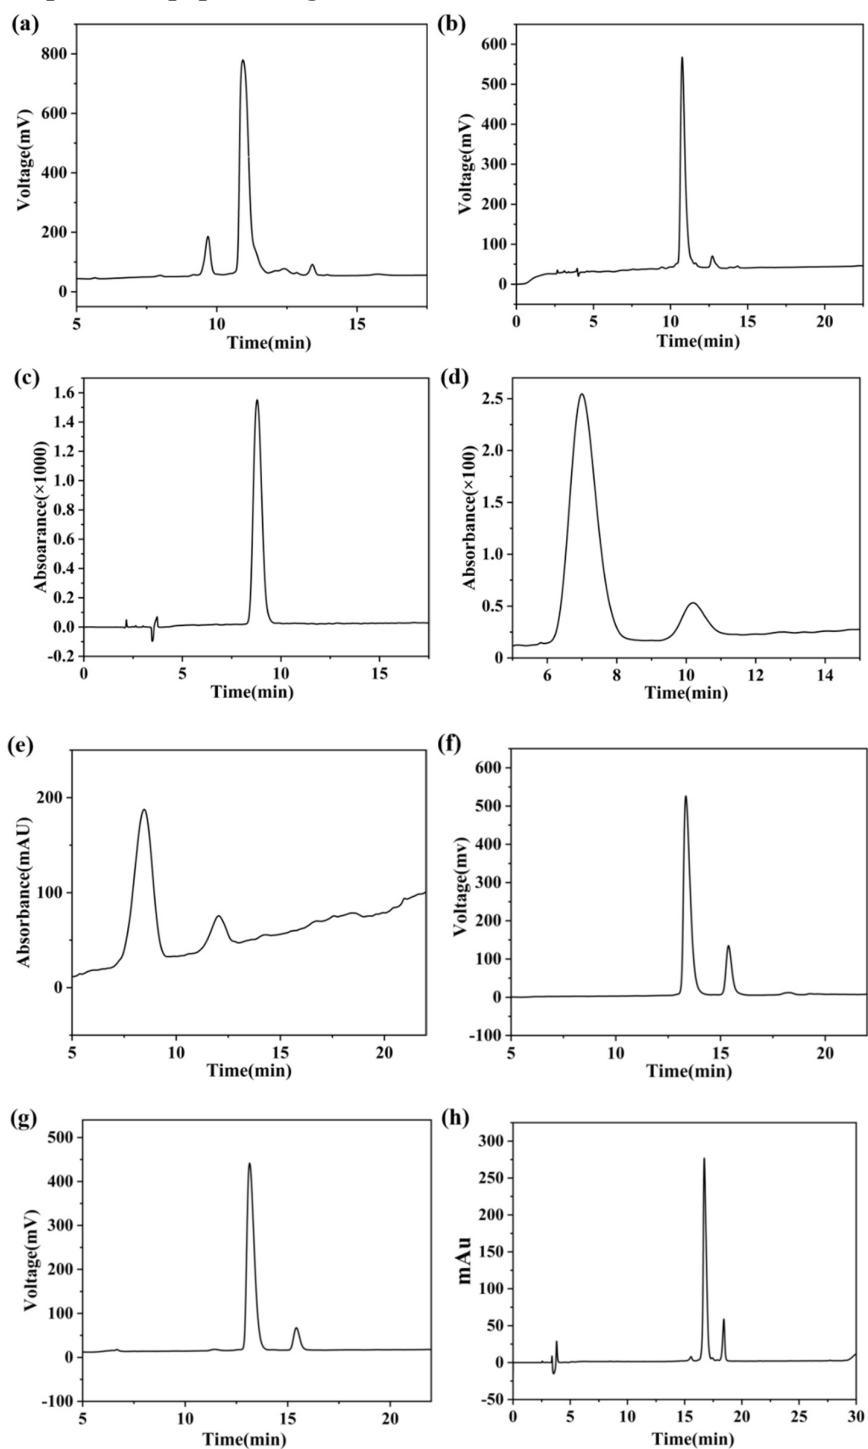

**Fig. S3** HPLC traces after purification of peptoid oligomers. (a) P-(Nis)<sub>6</sub>; (b) P-[Nis-(Nme)<sub>2</sub>]<sub>2</sub>;

(c) P-[Nis-(Net)<sub>2</sub>]<sub>2</sub>; (d) P-[Nis-(Npr)<sub>2</sub>]<sub>2</sub>; (e) P-[Nis-(Nip)<sub>2</sub>]<sub>2</sub>; (f) P-[Nme-(Nis)<sub>2</sub>]<sub>2</sub>; (g) P-(Nis-

Nme)<sub>3</sub>; (h) P-(Nis-Nme)<sub>3</sub>

#### 4. The morphologies of ice crystals

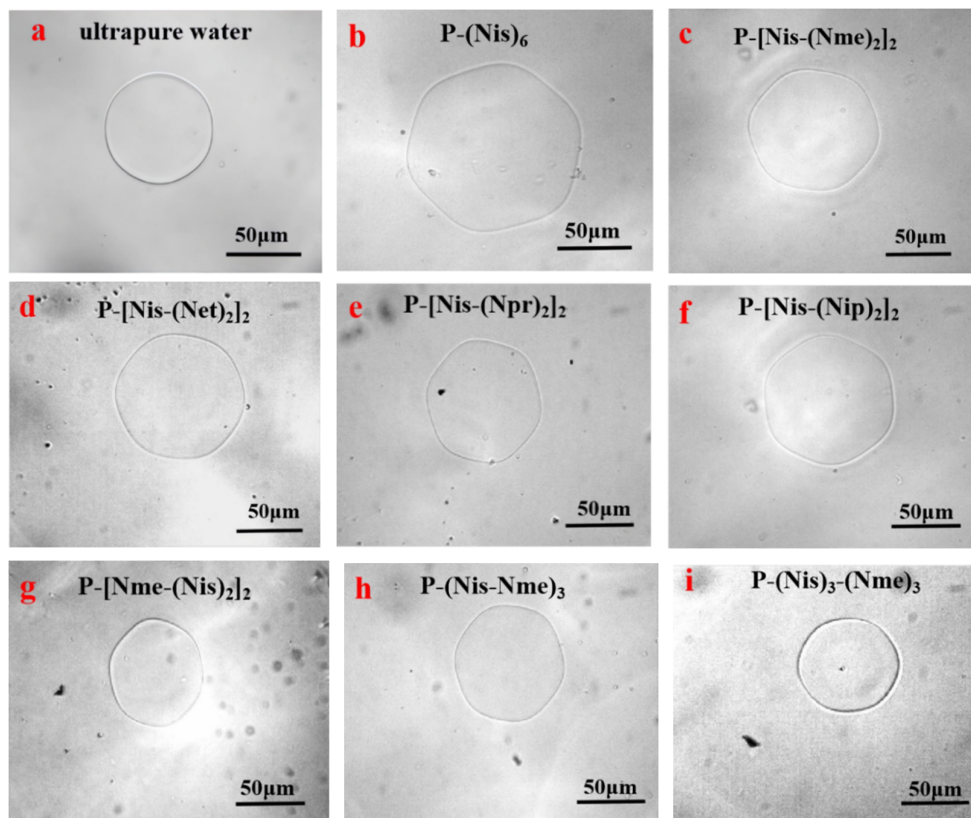

**Fig. S4** Optical images of ice crystal morphology in peptoid solutions and ultrapure water at the concentration of 10 mg/mL ( $\Delta T = 0.08$  °C). (a) ultrapure water; (b) P-(Nis)<sub>6</sub>; (c) P-[Nis-(Nme)<sub>2</sub>]<sub>2</sub>; (d) P-[Nis-(Net)<sub>2</sub>]<sub>2</sub>; (e) P-[Nis-(Npr)<sub>2</sub>]<sub>2</sub>; (f) P-[Nis-(Nip)<sub>2</sub>]<sub>2</sub>; (g) P-[Nme-(Nis)<sub>2</sub>]<sub>2</sub>; (h) P-(Nis-Nme)<sub>3</sub>; (i) P-(Nis-Nme)<sub>3</sub>.

## 5. The growth rates of ice crystals

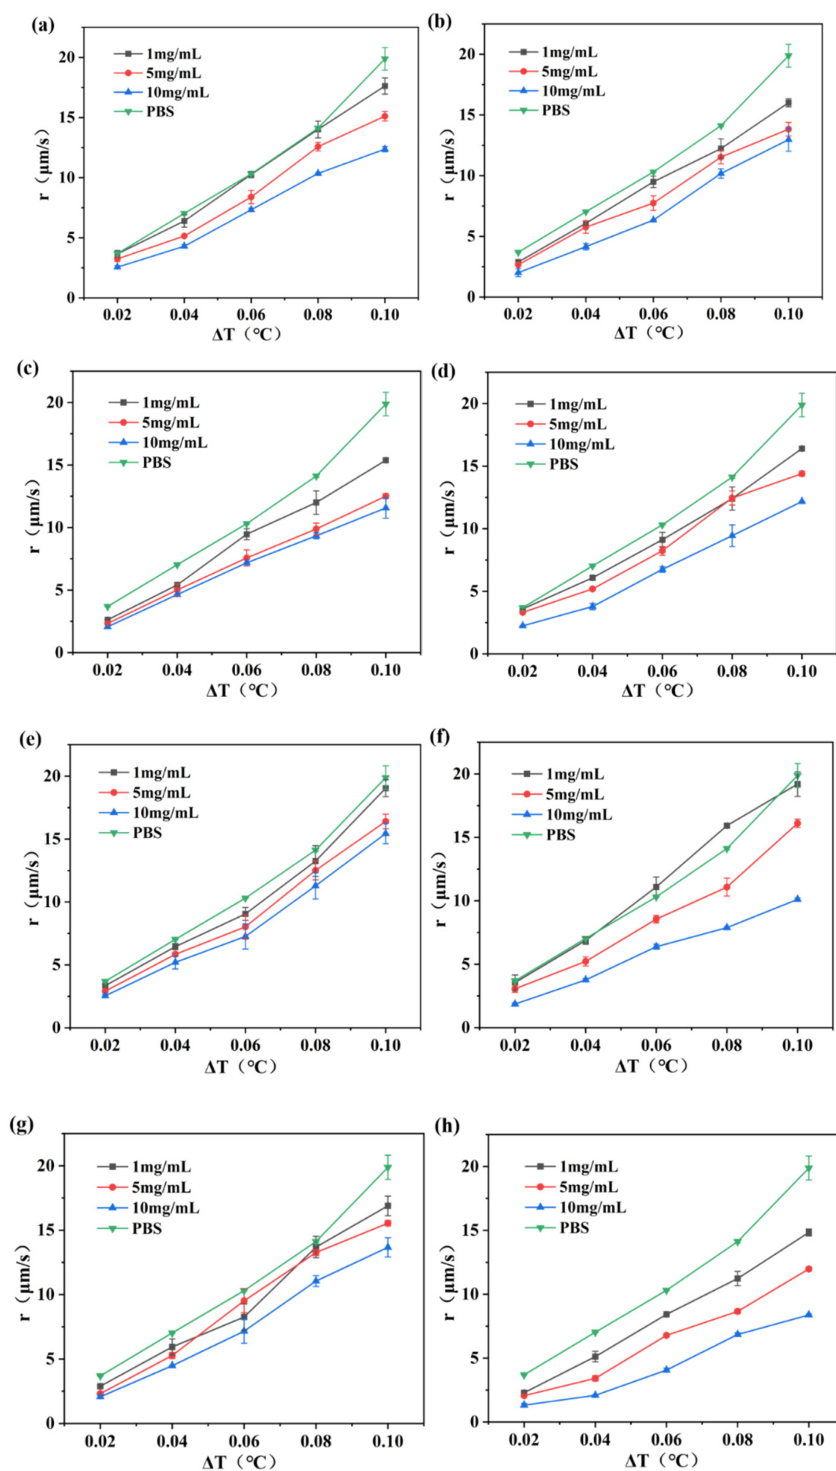

**Fig. S5** Comparison of ice crystal growth rates between peptoid oligomers solutions and PBS

buffer. (a) P-(Nis)<sub>6</sub>; (b) P-[Nis-(Nme)<sub>2</sub>]<sub>2</sub>; (c) P-[Nis-(Net)<sub>2</sub>]<sub>2</sub>; (d) P-[Nis-(Npr)<sub>2</sub>]<sub>2</sub>; (e) P-[Nis-(Nip)<sub>2</sub>]<sub>2</sub>; (f) P-[Nme-(Nis)<sub>2</sub>]<sub>2</sub>; (g) P-(Nis-Nme)<sub>3</sub>; (h) P-(Nis-Nme)<sub>3</sub>

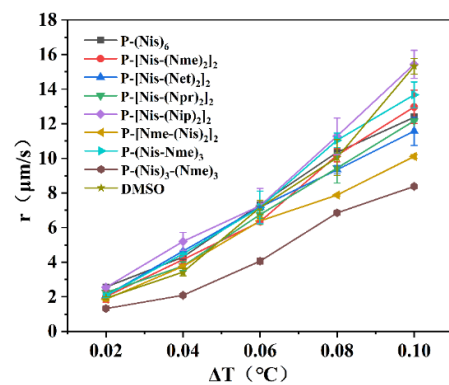

**Fig. S6** The ice crystal growth rates of all peptoid and DMSO solutions at the concentration of 10 mg/mL.

## 6. Ice recrystallization inhibition activities of peptoid oligomers

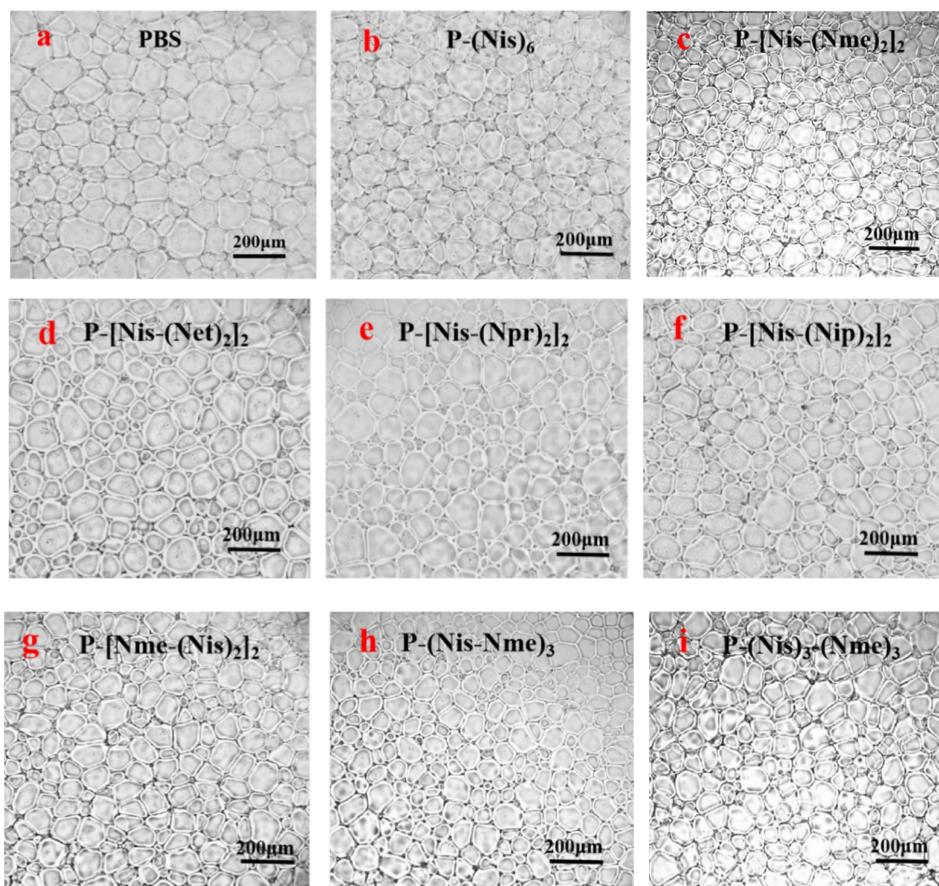

**Fig. S7** Micrographs of ice crystals grown in 10 mg/mL solution of peptoid solutions and PBS buffer.

(a) PBS; (b) P-(Nis)<sub>6</sub>; (c) P-[Nis-(Nme)<sub>2</sub>]<sub>2</sub>; (d) P-[Nis-(Net)<sub>2</sub>]<sub>2</sub>; (e) P-[Nis-(Npr)<sub>2</sub>]<sub>2</sub>; (f) P-[Nis-(Nip)<sub>2</sub>]<sub>2</sub>; (g) P-[Nme-(Nis)<sub>2</sub>]<sub>2</sub>; (h) P-(Nis-Nme)<sub>3</sub>; (i) P-(Nis-Nme)<sub>3</sub>.

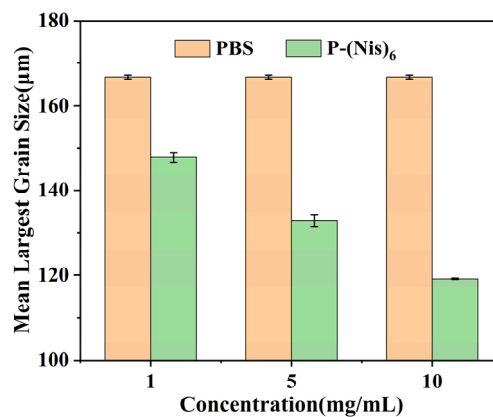

**Fig. S8** The MLGS of P-(Nis)<sub>6</sub> solution were compared with PBS buffer.

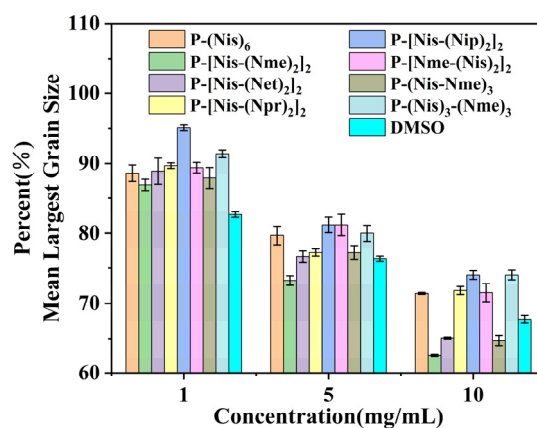

**Fig. S9** Percentage of MLGS of ice crystals in PBS buffer after peptides and DMSO solutions

annealing at -6 °C for 30 min.

## 7. Cytotoxicity test results

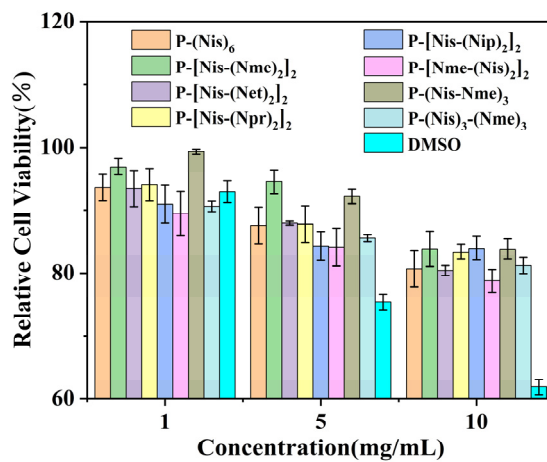

**Fig. S10** The relative cell viability of peptides and DMSO solutions at different concentrations.
